# Supplementary material
Source: publisher figshare collection journal article supplement (https://frontiersin.figshare.com/ndownloader/files/34988545)
Supplement: Supplementary file 1 [file 34988545]

## Sheet: Table S2
Table S2. nifH abundances (× 103 copies L-1) for each diazotroph phylotype (Trichodesmium, Crocosphaera, UCYN-A, Het-1 and Het-2) found in each sampled station. Values are reported for transect sampling depths (surface (Surf), 10 m, DCM and bDCM) and for sectors (West, Middle, East). Het-3 was not detected in any sample along the 18 station transect. BDL is below detection limit.
Station	Depth	Lat	Long	Trichodesmium	Crocosphaera	UCYN-A	Het-1	Het-2
1West	surf	-20.0576	-38.1341	115.429	103.414	BDL	BDL	2.67475
1West	10m	-20.0576	-38.1341	53.0161	127.862	BDL	BDL	1.67614
1West	DCM	-20.0576	-38.1341	15.2798	36.3638	4.71495	0.277383	0.283119
1West	bDCM	-20.0576	-38.1341	-	-	-	-	-
2West	surf	-20.3081	-38.133	21.6102	23.0193	BDL	BDL	1.07427
2West	10m	-20.3081	-38.133	48.3049	4.83373	BDL	BDL	0.52495
2West	DCM	-20.3081	-38.133	1.00294	1.17472	BDL	BDL	0.150671
2West	bDCM	-20.3081	-38.133	3.68695	11.2202	0.263027	0.0436516	0.0304322
3West	surf	-20.505	-38.1385	46.1744	119.842	0.10901	0.565706	1.34961
3West	10m	-20.505	-38.1385	7.33045	4.9331	BDL	BDL	0.387438
3West	DCM	-20.505	-38.1385	0.913454	30.443	3.92188	0.298651	0.100063
3West	bDCM	-20.505	-38.1385	-	-	-	-	-
4West	surf	-20.1924	-37.6548	96.6857	135.373	BDL	BDL	3.24041
4West	10m	-20.1924	-37.6548	208.985	16.4435	BDL	BDL	0.464607
4West	DCM	-20.1924	-37.6548	0.353734	1.96811	BDL	BDL	BDL
4West	bDCM	-20.1924	-37.6548	0.747052	2.59649	0	0.182216	0.16396
5West	surf	-20.5379	-37.2314	66.1813	38.6593	BDL	0.188859	0.643707
5West	10m	-20.5379	-37.2314	77.4468	311.972	BDL	BDL	0.62182
5West	DCM	-20.5379	-37.2314	0.459335	1.43384	BDL	BDL	0.048305
5West	bDCM	-20.5379	-37.2314	22.7925	47.6248	1.72122	0.28882	0.567871
6West	surf	-20.3518	-36.6828	33.9259	0.5	BDL	BDL	1.36162
6West	10m	-20.3518	-36.6828	20.6536	0.377358	BDL	0.052659	1.0938
6West	DCM	-20.3518	-36.6828	0.459335	1.43384	BDL	BDL	0.048305
6West	bDCM	-20.3518	-36.6828	0.57286	27.6065	17.6879	2.07182	BDL
1Middle	surf	-20.467	-35.9923	0.44714	23.1232	BDL	BDL	0
1Middle	10m	-20.467	-35.9923	1.47718	9.65911	0.0954747	0.147876	0.3754
1Middle	DCM	-20.467	-35.9923	0.459335	1.43384	0.291929	BDL	0.048305
1Middle	bDCM	-20.467	-35.9923	14.2433	49.4155	BDL	0.116363	1.14089
2Middle	surf	-20.5665	-35.3623	2.61165	9.31506	2.89596	0.0983325	0.821533
2Middle	10m	-20.5665	-35.3623	0.14115	1.31167	0.32539	BDL	BDL
2Middle	DCM	-20.5665	-35.3623	0.564936	0.899572	BDL	BDL	0.0966101
2Middle	bDCM	-20.5665	-35.3623	BDL	1.14347	25.6366	5.13503	2.24737
3Middle	surf	-20.6555	-34.7476	21.6618	107.628	BDL	0.0702662	0.351587
3Middle	10m	-20.6555	-34.7476	25.6579	347.683	0.559234	0.551931	1.00069
3Middle	DCM	-20.6555	-34.7476	1.24974	0.793495	BDL	BDL	0.175552
3Middle	bDCM	-20.6555	-34.7476	BDL	18.4099	0.705594	BDL	0.054862
4Middle	surf	-20.6306	-34.204	0.880309	25.9704	3.02346	BDL	0.388649
4Middle	10m	-20.6306	-34.204	1.4745	23.7691	2.3777	BDL	BDL
4Middle	DCM	-20.6306	-34.204	1.93455	0.687418	BDL	BDL	0.254493
4Middle	bDCM	-20.6306	-34.204	BDL	1.36117	0	1.88869	0.242143
5Middle	surf	-20.638	-33.4765	BDL	255.483	4.89389	0.462373	0.897834
5Middle	10m	-20.638	-33.4765	0.342443	318.578	5.96472	0.462373	0.629401
5Middle	DCM	-20.638	-33.4765	BDL	1.6029	BDL	BDL	0.0178556
5Middle	bDCM	-20.638	-33.4765	BDL	0.363156	6.30835	42.5651	0.101665
6Middle	surf	-20.6631	-32.8753	0.172432	348.377	0.827976	BDL	0.526459
6Middle	10m	-20.6631	-32.8753	BDL	28.284	2.03151	0.689098	0.252988
6Middle	DCM	-20.6631	-32.8753	BDL	0.786765	BDL	BDL	BDL
6Middle	bDCM	-20.6631	-32.8753	BDL	2.14532	BDL	BDL	0.483139
7Middle	surf	-20.6416	-32.2133	1.14472	122.959	15.2557	2.40671	2.51588
7Middle	10m	-20.6416	-32.2133	1.99787	112.953	4.19923	1.80655	1.99876
7Middle	DCM	-20.6416	-32.2133	BDL	0.685199	BDL	BDL	BDL
7Middle	bDCM	-20.6416	-32.2133	BDL	0.892425	BDL	BDL	BDL
1East	surf	-20.6614	-31.616	BDL	106.101	2.76589	2.69995	8.10757
1East	10m	-20.6614	-31.616	BDL	130.814	1.68953	2.45561	8.56965
1East	DCM	-20.6614	-31.616	BDL	0.57438	BDL	BDL	BDL
1East	bDCM	-20.6614	-31.616	BDL	0.9316	0.890187	33.4763	1.30874
2East	surf	-20.6333	-30.8117	0.26116	92.1909	2.13119	0.392057	0.545155
2East	10m	-20.6333	-30.8117	2.48047	93.4612	2.05072	0.710666	0.395547
2East	DCM	-20.6333	-30.8117	BDL	1.02169	BDL	0.627327	2.72986
2East	bDCM	-20.6333	-30.8117	BDL	0.434371	BDL	13.1435	2.99417
3East	surf	-20.6403	-29.9247	0.362663	107.713	8.90025	BDL	1.29205
3East	10m	-20.6403	-29.9247	BDL	139.167	5.53376	2.37688	0.503707
3East	DCM	-20.6403	-29.9247	BDL	0.818322	BDL	0.208372	0.0173946
3East	bDCM	-20.6403	-29.9247	BDL	0.554992	BDL	0.655013	BDL
4East	surf	-20.6114	-29.216	5.84917	50.2503	5.28796	BDL	0.316181
4East	10m	-20.6114	-29.216	2.2128	24.985	6.64847	0	0.413669
4East	DCM	-20.6114	-29.216	BDL	0.280397	BDL	2.07382	BDL
4East	bDCM	-20.6114	-29.216	BDL	0.644386	19.3708	BDL	BDL
5East	surf	-20.628	-28.3112	1.0423	124.918	7.59417	0.861387	2.4012
5East	10m	-20.628	-28.3112	0.51524	139.162	7.04046	0.85377	2.001
5East	DCM	-20.628	-28.3112	BDL	0.635086	BDL	BDL	0.0790882
5East	bDCM	-20.628	-28.3112	BDL	0.599689	9.68542	BDL	BDL
a Below Detection Limit (BDL)
